# Supplementary material for: Smoking Status at Diagnosis and Colorectal Cancer Prognosis According to Tumor Lymphocytic Reaction
Source: PubMed Central journal article supplement (PMC7477375; doi:10.1093/jncics/pkaa040), 2020-05-14
Supplement: pkaa040_supplementary_data.pdf [file pkaa040_supplementary_data.pdf]

## **Supplementary methods**

### **Assessment of dietary intake**

Data on dietary intake was collected in the two cohorts as reported previously (1,2). Dietary intake has been reported by participants on biennial questionnaires since 1980 (NHS) and 1986 (HPFS). Processed meat (hot dogs, bacon, deli meats) intake was classified as number of servings per day (1). Fiber intake was calculated using the Association of Official Analytical Chemists method (accepted by the U.S. Food and Drug Administration and the Food and Agriculture Organization of the World Health Organization for nutrition labeling purposes) (3). We adjusted processed meat intake for total caloric intake. Dietary intake at colorectal cancer diagnosis was derived from the latest available questionnaire before diagnosis.

### **Statistical analyses**

All statistical analyses were performed using SAS software (version 9.4, SAS Institute, Cary, NC, USA). All *P* values were two-sided. Our primary hypothesis test was an assessment of a statistical interaction between smoking status at diagnosis (ordinal; never, past, and current) and lymphocytic reaction in tumor tissue (binary classification of negative/low and intermediate/high) in a multivariable Cox proportional hazards regression model using the Wald test on the cross-product. We used the two-sided  $\alpha$ -level of 0.005 (5). Hazard ratio (HR) for smoking status at

diagnosis in strata of lymphocytic reaction components using a re-parameterization of the interaction term was also assessed in a single regression model (6).

Primary outcome endpoint of this study was colorectal cancer-specific mortality and secondary endpoint was overall mortality. For colorectal cancer-specific survival analyses, deaths of other causes and cases with missing data on cause of death were censored. Survival time was defined as the period from diagnosis of colorectal cancer to death or the end of follow-up, whichever came first.

In all survival analyses, we used covariate data of 4,420 incident colorectal cancer cases and the inverse probability weighting (IPW) method which is the method to reduce the bias of tissue selection by adding weights to each case with tumor tissue (6-8). Each case is weighted by the inverse of the probability of the tumor availability based on the multivariable-adjusted logistic regression model using the entire data set of colorectal cancer regardless of available tissue (6-8). First, the probability of tumor tissue as an outcome was estimated using the multivariable-adjusted logistic regression model, which initially included sex (female vs. male), age at diagnosis (continuous; a linear term, and a squared term), year of diagnosis (continuous; a linear term, and a squared term), family history of colorectal cancer (present vs. absent vs. missing), body mass index at diagnosis (< 25 kg/m<sup>2</sup> vs. 25 to 29.9 kg/m<sup>2</sup> vs. ≥ 30 kg/m<sup>2</sup> vs. missing), tumor location (cecum vs. ascending colon vs. transverse colon vs. descending colon vs. sigmoid colon vs. rectum vs. missing), and disease stage (I vs. II vs. III vs. IV vs. missing). A backward elimination with a threshold *P* of 0.20 was used to select variables for the final model. After the

selection procedure, the final model included sex, year of diagnosis (a linear term and a squared term), tumor location, and disease stage. Weights greater than the 95th percentile were truncated and set to the value of the 95th percentile to reduce outlier effects. We confirmed that results without weight truncation did not change substantially (data not shown). The IPW-adjusted Kaplan-Meier method was used to estimate the distribution of colorectal cancer-specific and overall survivals, and the weighted log-rank test was performed (9). Similar results were obtained by Cox regression analyses without the IPW.

IPW-adjusted multivariable Cox proportional hazards regression models were used to adjust for potential confounders and initially included followings: sex (i.e., cohort), age at diagnosis (continuous), year of diagnosis (continuous), family history of colorectal cancer (present vs. absent), body mass index (BMI) at diagnosis ( $\geq 30$  vs.  $< 30$  kg/m<sup>2</sup>), alcohol consumption at diagnosis ( $< 15$  vs.  $\geq 15$  g/day), physical activity at diagnosis ( $< 11.5$  vs.  $\geq 11.5$  metabolic equivalent task score (METS)-hours/week in female;  $< 22.5$  vs.  $\geq 22.5$  METS-hours/week in male), processed meat intake at diagnosis ( $< 0.09$  vs.  $\geq 0.09$  servings/day in female;  $< 0.13$  vs.  $\geq 0.13$  servings/day in male), total fiber intake at diagnosis ( $< 18.8$  vs.  $\geq 18.8$  g/day in female;  $< 22.2$  vs.  $\geq 22.2$  g/day in male), tumor location (proximal colon vs. distal colon vs. rectum), tumor differentiation (well to moderate vs. poor), disease stage (I-II vs. III-IV), MSI status (MSI-high vs. non-MSI-high vs. missing), CIMP (low/negative vs. high vs. missing), LINE-1 methylation level (continuous), *KRAS* mutation (mutant vs. wild-type vs. missing), *BRAF* mutation (mutant vs. wild-type vs. missing), and

*PIK3CA* mutation (mutant vs. wild-type vs. missing). A backward elimination with a threshold of  $P = 0.05$  was performed to select variables for the final models. Cases with missing data [family history of colorectal cancer (0.3%), body mass index (0.1%), alcohol consumption (0.3%), physical activity (5.0%), processed meat intake (0.1%), total fiber intake (0.1%), tumor location (0.3%), tumor differentiation (0.8%), disease stage (8.8%)] were included in the majority category of a given categorical covariate to limit the degrees of freedom of the models. For cases with missing data [MSI status (13%), CIMP status (15%), LINE-1 methylation level (14%), *KRAS* mutation (17%), *BRAF* mutation (12%), and *PIK3CA* mutation (18%)], we categorized them as a separate indicator variable. We confirmed that exclusion of cases with missing data in any of the covariates did not substantially alter the results (data not shown). The proportionality of hazards assumption was assessed using a time varying covariate, which is an interaction term of survival time and smoking status at diagnosis. The proportionality of hazards assumption was generally satisfied for cancer specific survival ( $P > 0.28$ ).

Furthermore, we investigated whether the prognostic prediction model can improve accuracy by adding smoking status at diagnosis and TIL status to the prediction model based on other clinical prognostic variables in the following approach. First, the candidate variables were initially included in a multivariate logistic regression model as follows; sex (i.e., cohort), age at diagnosis (continuous), year of diagnosis (continuous), family history of colorectal cancer (present vs. absent), body mass index (BMI) at diagnosis ( $\geq 30$  vs.  $< 30$  kg/m<sup>2</sup>), alcohol

consumption at diagnosis (< 15 vs.  $\geq$  15 g/day), physical activity at diagnosis (female: 0 to 11.5 vs.  $\geq$  11.5 METS-hours/week; male: 0 to < 22.5 vs.  $\geq$  22.5 METS-hours/week), processed meat intake at diagnosis (< 0.09 vs.  $\geq$  0.09 servings/day in female; < 0.13 vs.  $\geq$  0.13 servings/day in male), total fiber intake at diagnosis (< 18.8 vs.  $\geq$  18.8 g/day in female; < 22.2 vs.  $\geq$  22.2 g/day in male), tumor location (proximal colon vs. distal colon vs. rectum), tumor differentiation (well to moderate vs. poor), disease stage (I-II vs. III-IV), MSI status (MSI-high vs. non-MSI-high vs. missing), CIMP (low/negative vs. high vs. missing), LINE-1 methylation level (continuous), *KRAS* mutation (mutant vs. wild-type vs. missing), *BRAF* mutation (mutant vs. wild-type vs. missing), and *PIK3CA* mutation (mutant vs. wild-type vs. missing). Then, a backward elimination with a threshold of  $P = 0.05$  was performed to select variables for the final models. We finally included age, year of diagnosis, tumor location, tumor differentiation, disease stage, microsatellite instability, long interspersed nucleotide element-1 methylation level, *KRAS* mutation, and *BRAF* mutation in the prediction model for five-year colorectal cancer-specific survival. The final model for five-year overall survival included age, year of diagnosis, tumor differentiation, disease stage, microsatellite instability, and *BRAF* mutation. We also constructed prediction models by adding smoking status at diagnosis and/or TIL status. To compare the model discrimination performance, we drew receiver-operating characteristics (ROC) curves and compared the area under the ROC curve between these models.

## References

1. Willett WC, Howe GR, Kushi LH. Adjustment for total energy intake in epidemiologic studies. *Am J Clin Nutr* 1997;65(4 Suppl):1220S-1228S; discussion 1229S-1231S.
2. Song M, Wu K, Meyerhardt JA, *et al.* Fiber Intake and Survival After Colorectal Cancer Diagnosis. *JAMA Oncol* 2018;4(1):71-79.
3. Prosky L, Asp NG, Furda I, *et al.* Determination of total dietary fiber in foods and food products: collaborative study. *J Assoc Off Anal Chem* 1985;68(4):677-9.
4. Pan A, Sun Q, Bernstein AM, *et al.* Red meat consumption and mortality: results from 2 prospective cohort studies. *Arch Intern Med* 2012;172(7):555-63.
5. Benjamin DJ, Berger JO, Johannesson M, *et al.* Redefine statistical significance. *Nat Hum Behav* 2018;2(1):6-10.
6. Hamada T, Cao Y, Qian ZR, *et al.* Aspirin Use and Colorectal Cancer Survival According to Tumor CD274 (Programmed Cell Death 1 Ligand 1) Expression Status. *J Clin Oncol* 2017;35(16):1836-1844.
7. Liu L, Nevo D, Nishihara R, *et al.* Utility of inverse probability weighting in molecular pathological epidemiology. *Eur J Epidemiol* 2018;33(4):381-392.
8. Seaman SR, White IR. Review of inverse probability weighting for dealing with missing data. *Stat Methods Med Res* 2013;22(3):278-95.
9. Xie J, Liu C. Adjusted Kaplan-Meier estimator and log-rank test with inverse probability of treatment weighting for survival data. *Stat Med* 2005;24(20):3089-110.

Supplementary table S1. Colorectal cancer mortality according to smoking status at diagnosis in strata of tumor-infiltrating lymphocytes (the final multivariable models)

|                                             | Colorectal cancer-specific mortality       | Overall mortality                          |
|---------------------------------------------|--------------------------------------------|--------------------------------------------|
|                                             | Multivariable HR (95% CI) <sup>*,†,‡</sup> | Multivariable HR (95% CI) <sup>*,†,‡</sup> |
| <b>Tumor-infiltrating lymphocytes</b>       |                                            |                                            |
| Negative/low                                |                                            |                                            |
| Never smoker                                | 1 (referent)                               | 1 (referent)                               |
| Past smoker                                 | 0.80 (0.63-1.02)                           | 0.95 (0.79-1.14)                           |
| Current smoker                              | 1.50 (1.10-2.06)                           | 1.93 (1.47-2.55)                           |
| Intermediate/high                           |                                            |                                            |
| Never smoker                                | 1 (referent)                               | 1 (referent)                               |
| Past smoker                                 | 0.54 (0.31-0.94)                           | 0.85 (0.62-1.15)                           |
| Current smoker                              | 0.43 (0.16-1.12)                           | 1.09 (0.68-1.75)                           |
| Age (per 10-year increase)                  | 1.29 (1.13-1.47)                           | 1.90 (1.71-2.13)                           |
| Female                                      | Did not remain in this model               | 1.25 (1.08-1.46)                           |
| Year of diagnosis (per 5-year increase)     | 0.86 (0.77-0.95)                           | Did not remain in this model               |
| Tumor location                              |                                            |                                            |
| Proximal colon                              | 1 (referent)                               |                                            |
| Distal colon                                | 0.76 (0.59-0.97)                           | Did not remain in this model               |
| Rectum                                      | 0.89 (0.68-1.17)                           |                                            |
| AJCC disease stage                          |                                            |                                            |
| I-II                                        | 1 (referent)                               | 1 (referent)                               |
| III-IV                                      | 5.74 (4.51-7.32)                           | 2.30 (2.00-2.64)                           |
| Tumor differentiation                       |                                            |                                            |
| Well to moderate                            | 1 (referent)                               | 1 (referent)                               |
| Poor                                        | 2.70 (1.94-3.75)                           | 1.76 (1.38-2.26)                           |
| MSI status                                  |                                            |                                            |
| Non-MSI-high                                | 1 (referent)                               | Did not remain in this model               |
| MSI-high                                    | 0.27 (0.15-0.48)                           |                                            |
| LINE-1 methylation level (per 30% decrease) | 1.69 (1.22-2.34)                           | 1.42 (1.10-1.82)                           |
| <i>BRAF</i> status                          |                                            |                                            |
| Wild type                                   | 1 (referent)                               | 1 (referent)                               |
| Mutant                                      | 1.89 (1.33-2.69)                           | 1.29 (1.00-1.65)                           |

\* IPW was applied to reduce a bias due to the availability of tumor tissue after cancer diagnosis (see "Statistical Analysis" subsection for details).

† HRs were estimated for each stratum on the basis of the cases with smoking status at diagnosis, using a re-parameterization of the interaction term in a single regression model for the stratified analyses.

‡ The multivariable Cox regression model initially included age, sex, year of diagnosis, family history of colorectal cancer, body mass index at diagnosis, alcohol consumption at diagnosis, physical activity at diagnosis, processed meat intake at diagnosis, total fiber intake at diagnosis, tumor location, tumor differentiation, AJCC disease stage, microsatellite instability, CpG island methylator phenotype, long interspersed nucleotide element-1 methylation level, *KRAS* mutation, *BRAF* mutation, and *PIK3CA* mutation. A backward elimination with a threshold of  $P = 0.05$  was used to select variables in the final models.

Abbreviations: CI, confidence interval; HR, hazard ratio; IPW, inverse probability weighting; LINE-1, long interspersed nucleotide element-1; METS, metabolic equivalent task score; MSI, microsatellite instability.

Supplementary table S2. Smoking status at diagnosis and colorectal cancer mortality in strata of levels of lymphocytic reaction patterns (binary smoking status for  $P_{interaction}$ )

|                                                          | No. of cases | Colorectal cancer-specific mortality <sup>*,†</sup> |                         |                                        | Overall mortality <sup>*,†</sup> |                         |                                        |
|----------------------------------------------------------|--------------|-----------------------------------------------------|-------------------------|----------------------------------------|----------------------------------|-------------------------|----------------------------------------|
|                                                          |              | No. of events                                       | Univariable HR (95% CI) | Multivariable HR (95% CI) <sup>‡</sup> | No. of events                    | Univariable HR (95% CI) | Multivariable HR (95% CI) <sup>‡</sup> |
| <b>Tumor-infiltrating lymphocytes (n = 1,470)</b>        |              |                                                     |                         |                                        |                                  |                         |                                        |
| Negative/low                                             |              |                                                     |                         |                                        |                                  |                         |                                        |
| Never smoker                                             | 458          | 141                                                 | 1 (referent)            | 1 (referent)                           | 262                              | 1 (referent)            | 1 (referent)                           |
| Past smoker                                              | 538          | 158                                                 | 0.89 (0.70-1.13)        | 0.80 (0.63-1.02)                       | 320                              | 1.05 (0.87-1.27)        | 0.95 (0.79-1.14)                       |
| Current smoker                                           | 104          | 54                                                  | 1.79 (1.30-2.45)        | 1.50 (1.10-2.06)                       | 83                               | 1.64 (1.24-2.15)        | 1.93 (1.47-2.55)                       |
| Intermediate/high                                        |              |                                                     |                         |                                        |                                  |                         |                                        |
| Never smoker                                             | 142          | 36                                                  | 1 (referent)            | 1 (referent)                           | 80                               | 1 (referent)            | 1 (referent)                           |
| Past smoker                                              | 187          | 30                                                  | 0.53 (0.32-0.91)        | 0.54 (0.31-0.94)                       | 101                              | 0.95 (0.71-1.28)        | 0.85 (0.62-1.15)                       |
| Current smoker                                           | 41           | 7                                                   | 0.47 (0.20-1.13)        | 0.43 (0.16-1.12)                       | 31                               | 0.92 (0.60-1.41)        | 1.09 (0.68-1.75)                       |
| $P_{interaction}$ (non-current vs. current) <sup>§</sup> |              |                                                     | 0.017                   | 0.032                                  |                                  | 0.029                   | 0.036                                  |
| $P_{interaction}$ (never vs. ever) <sup>¶</sup>          |              |                                                     | 0.013                   | 0.044                                  |                                  | 0.25                    | 0.28                                   |
| <b>Intratumoral periglandular reaction (n = 1,470)</b>   |              |                                                     |                         |                                        |                                  |                         |                                        |
| Negative/low                                             |              |                                                     |                         |                                        |                                  |                         |                                        |
| Never smoker                                             | 80           | 41                                                  | 1 (referent)            | 1 (referent)                           | 54                               | 1 (referent)            | 1 (referent)                           |
| Past smoker                                              | 90           | 34                                                  | 0.64 (0.40-1.03)        | 0.67 (0.42-1.07)                       | 51                               | 1.11 (0.68-1.81)        | 0.85 (0.56-1.28)                       |
| Current smoker                                           | 21           | 10                                                  | 1.02 (0.48-2.18)        | 0.89 (0.43-1.82)                       | 14                               | 1.41 (0.67-2.95)        | 1.29 (0.60-2.78)                       |
| Intermediate/high                                        |              |                                                     |                         |                                        |                                  |                         |                                        |
| Never smoker                                             | 519          | 136                                                 | 1 (referent)            | 1 (referent)                           | 288                              | 1 (referent)            | 1 (referent)                           |
| Past smoker                                              | 635          | 153                                                 | 0.86 (0.67-1.10)        | 0.78 (0.60-1.00)                       | 369                              | 1.03 (0.87-1.22)        | 0.92 (0.78-1.09)                       |
| Current smoker                                           | 125          | 52                                                  | 1.54 (1.11-2.15)        | 1.28 (0.90-1.81)                       | 101                              | 1.41 (1.11-1.80)        | 1.68 (1.30-2.17)                       |
| $P_{interaction}$ (non-current vs. current) <sup>§</sup> |              |                                                     | 0.46                    | 0.41                                   |                                  | 0.93                    | 0.71                                   |
| $P_{interaction}$ (never vs. ever) <sup>¶</sup>          |              |                                                     | 0.23                    | 0.59                                   |                                  | 0.79                    | 0.83                                   |



**Peritumoral lymphocytic reaction (n = 1,465)**

|                                                                 |     |     |                  |                  |     |                  |                  |
|-----------------------------------------------------------------|-----|-----|------------------|------------------|-----|------------------|------------------|
| Negative/low                                                    |     |     |                  |                  |     |                  |                  |
| Never smoker                                                    | 92  | 48  | 1 (referent)     | 1 (referent)     | 66  | 1 (referent)     | 1 (referent)     |
| Past smoker                                                     | 93  | 43  | 0.79 (0.51-1.22) | 0.99 (0.63-1.56) | 58  | 1.08 (0.65-1.78) | 0.93 (0.62-1.38) |
| Current smoker                                                  | 24  | 13  | 0.97 (0.49-1.94) | 0.86 (0.46-1.61) | 19  | 1.24 (0.67-2.29) | 1.38 (0.76-2.51) |
| Intermediate/high                                               |     |     |                  |                  |     |                  |                  |
| Never smoker                                                    | 506 | 129 | 1 (referent)     | 1 (referent)     | 276 | 1 (referent)     | 1 (referent)     |
| Past smoker                                                     | 628 | 144 | 0.83 (0.65-1.07) | 0.73 (0.56-0.94) | 361 | 1.04 (0.87-1.23) | 0.92 (0.77-1.09) |
| Current smoker                                                  | 122 | 49  | 1.54 (1.10-2.16) | 1.29 (0.90-1.84) | 96  | 1.43 (1.11-1.84) | 1.65 (1.26-2.16) |
| $P_{\text{interaction}}$ (non-current vs. current) <sup>§</sup> |     |     | 0.22             | 0.16             |     | 0.61             | 0.61             |
| $P_{\text{interaction}}$ (never vs. ever) <sup>¶</sup>          |     |     | 0.59             | 0.46             |     | 0.94             | 0.45             |

**Crohn's-like lymphoid reaction (n = 1,207)**

|                                                                 |     |     |                  |                  |     |                  |                  |
|-----------------------------------------------------------------|-----|-----|------------------|------------------|-----|------------------|------------------|
| Negative/low                                                    |     |     |                  |                  |     |                  |                  |
| Never smoker                                                    | 391 | 131 | 1 (referent)     | 1 (referent)     | 235 | 1 (referent)     | 1 (referent)     |
| Past smoker                                                     | 440 | 129 | 0.81 (0.63-1.05) | 0.81 (0.62-1.05) | 260 | 0.97 (0.78-1.19) | 0.94 (0.77-1.15) |
| Current smoker                                                  | 84  | 43  | 1.63 (1.16-2.29) | 1.37 (0.96-1.96) | 67  | 1.45 (1.04-2.01) | 1.78 (1.28-2.48) |
| Intermediate/high                                               |     |     |                  |                  |     |                  |                  |
| Never smoker                                                    | 98  | 20  | 1 (referent)     | 1 (referent)     | 53  | 1 (referent)     | 1 (referent)     |
| Past smoker                                                     | 163 | 21  | 0.46 (0.24-0.88) | 0.42 (0.21-0.83) | 83  | 0.91 (0.66-1.27) | 0.72 (0.51-1.00) |
| Current smoker                                                  | 31  | 5   | 0.55 (0.19-1.61) | 0.65 (0.23-1.88) | 23  | 1.08 (0.72-1.60) | 1.30 (0.84-2.02) |
| $P_{\text{interaction}}$ (non-current vs. current) <sup>§</sup> |     |     | 0.16             | 0.53             |     | 0.26             | 0.61             |
| $P_{\text{interaction}}$ (never vs. ever) <sup>¶</sup>          |     |     | 0.043            | 0.078            |     | 0.61             | 0.33             |

\* IPW was applied to reduce a bias due to the availability of tumor tissue after cancer diagnosis (see "Statistical Analysis" subsection for details).

† HRs were estimated for each stratum on the basis of the cases with smoking status at diagnosis, using a re-parameterization of the interaction term in a single regression model for the stratified analyses.

‡ The multivariable Cox regression model initially included age, sex, year of diagnosis, family history of colorectal cancer, body mass index at diagnosis, alcohol consumption at diagnosis, physical activity at diagnosis, processed meat intake at diagnosis, total fiber intake at diagnosis, tumor location, tumor differentiation, AJCC disease stage, microsatellite instability, CpG island methylator phenotype, long interspersed nucleotide element-1 methylation level, *KRAS* mutation, *BRAF* mutation, and *PIK3CA* mutation. A backward elimination with a threshold of  $P = 0.05$  was used to select variables in the final models.

§-¶  $P_{\text{interaction}}$  was calculated using the Wald test for the cross-product of smoking status at diagnosis [binary; non-current (never and past) and current<sup>§</sup>; never and ever (past and current)<sup>¶</sup>] and lymphocytic reaction status (binary; negative/low and intermediate/high) in Cox regression model.

Abbreviations: CI, confidence interval; HR, hazard ratio; IPW, inverse probability weighting.

Supplementary table S3. Smoking status at diagnosis and colorectal cancer mortality in strata of levels of lymphocytic reaction patterns (without inverse probability weighting method)

|                                                                      | No. of cases | Colorectal cancer-specific mortality* |                         |                                        | Overall mortality* |                         |                                        |
|----------------------------------------------------------------------|--------------|---------------------------------------|-------------------------|----------------------------------------|--------------------|-------------------------|----------------------------------------|
|                                                                      |              | No. of events                         | Univariable HR (95% CI) | Multivariable HR (95% CI) <sup>†</sup> | No. of events      | Univariable HR (95% CI) | Multivariable HR (95% CI) <sup>†</sup> |
| <b>Tumor-infiltrating lymphocytes (n = 1,470)</b>                    |              |                                       |                         |                                        |                    |                         |                                        |
| Negative/low                                                         |              |                                       |                         |                                        |                    |                         |                                        |
| Never smoker                                                         | 458          | 141                                   | 1 (referent)            | 1 (referent)                           | 262                | 1 (referent)            | 1 (referent)                           |
| Past smoker                                                          | 538          | 158                                   | 0.97 (0.77-1.21)        | 0.92 (0.73-1.16)                       | 320                | 1.10 (0.94-1.30)        | 1.03 (0.88-1.22)                       |
| Current smoker                                                       | 104          | 54                                    | 1.94 (1.42-2.66)        | 1.71 (1.24-2.37)                       | 83                 | 1.71 (1.34-2.19)        | 2.04 (1.58-2.63)                       |
| Intermediate/high                                                    |              |                                       |                         |                                        |                    |                         |                                        |
| Never smoker                                                         | 142          | 36                                    | 1 (referent)            | 1 (referent)                           | 80                 | 1 (referent)            | 1 (referent)                           |
| Past smoker                                                          | 187          | 30                                    | 0.60 (0.37-0.97)        | 0.61 (0.38-0.99)                       | 101                | 0.96 (0.72-1.29)        | 0.84 (0.63-1.13)                       |
| Current smoker                                                       | 41           | 7                                     | 0.61 (0.27-1.36)        | 0.65 (0.29-1.47)                       | 31                 | 1.06 (0.70-1.61)        | 1.33 (0.87-2.02)                       |
| $P_{\text{interaction}}^{\ddagger}$                                  |              |                                       | 0.004                   | 0.015                                  |                    | 0.088                   | 0.11                                   |
| $P_{\text{interaction}}^{\S}$ (non-current vs. current) <sup>§</sup> |              |                                       | 0.032                   | 0.075                                  |                    | 0.079                   | 0.17                                   |
| <b>Intratumoral periglandular reaction (n = 1,470)</b>               |              |                                       |                         |                                        |                    |                         |                                        |
| Negative/low                                                         |              |                                       |                         |                                        |                    |                         |                                        |
| Never smoker                                                         | 80           | 41                                    | 1 (referent)            | 1 (referent)                           | 54                 | 1 (referent)            | 1 (referent)                           |
| Past smoker                                                          | 90           | 34                                    | 0.70 (0.44-1.10)        | 0.78 (0.50-1.24)                       | 51                 | 1.04 (0.70-1.52)        | 0.88 (0.60-1.30)                       |
| Current smoker                                                       | 21           | 10                                    | 0.99 (0.50-1.98)        | 1.14 (0.56-2.31)                       | 14                 | 1.25 (0.70-2.26)        | 1.38 (0.76-2.51)                       |
| Intermediate/high                                                    |              |                                       |                         |                                        |                    |                         |                                        |
| Never smoker                                                         | 519          | 136                                   | 1 (referent)            | 1 (referent)                           | 288                | 1 (referent)            | 1 (referent)                           |
| Past smoker                                                          | 635          | 153                                   | 0.92 (0.73-1.16)        | 0.87 (0.69-1.10)                       | 369                | 1.08 (0.93-1.26)        | 0.99 (0.85-1.15)                       |
| Current smoker                                                       | 125          | 52                                    | 1.71 (1.24-2.35)        | 1.50 (1.08-2.09)                       | 101                | 1.54 (1.23-1.93)        | 1.83 (1.45-2.31)                       |
| $P_{\text{interaction}}^{\ddagger}$                                  |              |                                       | 0.11                    | 0.42                                   |                    | 0.55                    | 0.39                                   |
| $P_{\text{interaction}}^{\S}$ (non-current vs. current) <sup>§</sup> |              |                                       | 0.27                    | 0.54                                   |                    | 0.55                    | 0.46                                   |
| <b>Peritumoral lymphocytic reaction (n = 1,465)</b>                  |              |                                       |                         |                                        |                    |                         |                                        |
| Negative/low                                                         |              |                                       |                         |                                        |                    |                         |                                        |
| Never smoker                                                         | 92           | 48                                    | 1 (referent)            | 1 (referent)                           | 66                 | 1 (referent)            | 1 (referent)                           |
| Past smoker                                                          | 93           | 43                                    | 0.85 (0.56-1.28)        | 1.13 (0.74-1.71)                       | 58                 | 1.01 (0.71-1.44)        | 1.02 (0.71-1.45)                       |
| Current smoker                                                       | 24           | 13                                    | 1.08 (0.59-1.99)        | 1.18 (0.63-2.21)                       | 19                 | 1.18 (0.71-1.97)        | 1.49 (0.89-2.51)                       |
| Intermediate/high                                                    |              |                                       |                         |                                        |                    |                         |                                        |
| Never smoker                                                         | 506          | 129                                   | 1 (referent)            | 1 (referent)                           | 276                | 1 (referent)            | 1 (referent)                           |
| Past smoker                                                          | 628          | 144                                   | 0.90 (0.71-1.14)        | 0.83 (0.66-1.06)                       | 361                | 1.10 (0.94-1.28)        | 0.99 (0.84-1.16)                       |
| Current smoker                                                       | 122          | 49                                    | 1.70 (1.22-2.36)        | 1.48 (1.06-2.08)                       | 96                 | 1.56 (1.24-1.97)        | 1.81 (1.43-2.30)                       |
| $P_{\text{interaction}}^{\ddagger}$                                  |              |                                       | 0.26                    | 0.99                                   |                    | 0.36                    | 0.59                                   |
| $P_{\text{interaction}}^{\S}$ (non-current vs. current) <sup>§</sup> |              |                                       | 0.20                    | 0.26                                   |                    | 0.39                    | 0.44                                   |

**Crohn's-like lymphoid reaction (n = 1,207)**

|                                                                      |     |     |                  |                  |     |                  |                  |
|----------------------------------------------------------------------|-----|-----|------------------|------------------|-----|------------------|------------------|
| Negative/low                                                         |     |     |                  |                  |     |                  |                  |
| Never smoker                                                         | 391 | 131 | 1 (referent)     | 1 (referent)     | 235 | 1 (referent)     | 1 (referent)     |
| Past smoker                                                          | 440 | 129 | 0.86 (0.68-1.10) | 0.87 (0.68-1.11) | 260 | 1.01 (0.84-1.20) | 0.99 (0.83-1.19) |
| Current smoker                                                       | 84  | 43  | 1.70 (1.21-2.40) | 1.50 (1.05-2.14) | 67  | 1.57 (1.20-2.06) | 1.96 (1.48-2.59) |
| Intermediate/high                                                    |     |     |                  |                  |     |                  |                  |
| Never smoker                                                         | 98  | 20  | 1 (referent)     | 1 (referent)     | 53  | 1 (referent)     | 1 (referent)     |
| Past smoker                                                          | 163 | 21  | 0.61 (0.33-1.13) | 0.58 (0.31-1.08) | 83  | 0.97 (0.69-1.37) | 0.84 (0.59-1.19) |
| Current smoker                                                       | 31  | 5   | 0.70 (0.26-1.87) | 0.77 (0.29-2.06) | 23  | 1.08 (0.66-1.77) | 1.37 (0.83-2.24) |
| $P_{\text{interaction}}^{\ddagger}$                                  |     |     | 0.088            | 0.16             |     | 0.36             | 0.34             |
| $P_{\text{interaction}}^{\S}$ (non-current vs. current) <sup>§</sup> |     |     | 0.17             | 0.36             |     | 0.18             | 0.34             |

\* HRs were estimated for each stratum on the basis of the cases with smoking status at diagnosis, using a re-parameterization of the interaction term in a single regression model for the stratified analyses.

<sup>†</sup> The multivariable Cox regression model initially included age, sex, year of diagnosis, family history of colorectal cancer, body mass index at diagnosis, alcohol consumption at diagnosis, physical activity at diagnosis, processed meat intake at diagnosis, total fiber intake at diagnosis, tumor location, tumor differentiation, AJCC disease stage, microsatellite instability, CpG island methylator phenotype, long interspersed nucleotide element-1 methylation level, *KRAS* mutation, *BRAF* mutation, and *PIK3CA* mutation. A backward elimination with a threshold of  $P = 0.05$  was used to select variables in the final models.

<sup>‡</sup>  $P_{\text{interaction}}$  was calculated using the Wald test for the cross-product of smoking status at diagnosis (ordinal; never, past, and current) and lymphocytic reaction status (binary; negative/low and intermediate/high) in Cox regression model.

<sup>§</sup>  $P_{\text{interaction}}$  was calculated using the Wald test for the cross-product of smoking status at diagnosis (binary; non-current vs. current) and lymphocytic reaction status (binary; negative/low and intermediate/high) in Cox regression model.

Abbreviations: CI, confidence interval; HR, hazard ratio.

Supplementary table S4. Smoking status at diagnosis and colorectal cancer mortality in strata of levels of lymphocytic reaction patterns

|                                            | No. of cases | Colorectal cancer-specific mortality <sup>†</sup> |                         |                                        | Overall mortality <sup>†</sup> |                         |                                        |
|--------------------------------------------|--------------|---------------------------------------------------|-------------------------|----------------------------------------|--------------------------------|-------------------------|----------------------------------------|
|                                            |              | No. of events                                     | Univariable HR (95% CI) | Multivariable HR (95% CI) <sup>‡</sup> | No. of events                  | Univariable HR (95% CI) | Multivariable HR (95% CI) <sup>‡</sup> |
| <b>Tumor-infiltrating lymphocytes</b>      |              |                                                   |                         |                                        |                                |                         |                                        |
| <b>Female (NHS) (n = 842)</b>              |              |                                                   |                         |                                        |                                |                         |                                        |
| Negative/low                               |              |                                                   |                         |                                        |                                |                         |                                        |
| Never smoker                               | 257          | 82                                                | 1 (referent)            | 1 (referent)                           | 151                            | 1 (referent)            | 1 (referent)                           |
| Past smoker                                | 276          | 80                                                | 0.88 (0.64-1.21)        | 0.82 (0.59-1.13)                       | 165                            | 1.04 (0.80-1.34)        | 1.01 (0.78-1.30)                       |
| Current smoker                             | 69           | 36                                                | 1.65 (1.12-2.43)        | 1.21 (0.83-1.77)                       | 54                             | 1.57 (1.12-2.19)        | 1.82 (1.29-2.58)                       |
| Intermediate/high                          |              |                                                   |                         |                                        |                                |                         |                                        |
| Never smoker                               | 94           | 27                                                | 1 (referent)            | 1 (referent)                           | 55                             | 1 (referent)            | 1 (referent)                           |
| Past smoker                                | 112          | 13                                                | 0.41 (0.20-0.84)        | 0.43 (0.21-0.85)                       | 59                             | 0.93 (0.65-1.33)        | 0.85 (0.57-1.27)                       |
| Current smoker                             | 34           | 4                                                 | 0.32 (0.11-0.96)        | 0.26 (0.08-0.92)                       | 26                             | 0.86 (0.54-1.38)        | 0.94 (0.52-1.71)                       |
| <b>Male (HPFS) (n = 628)</b>               |              |                                                   |                         |                                        |                                |                         |                                        |
| Negative/low                               |              |                                                   |                         |                                        |                                |                         |                                        |
| Never smoker                               | 201          | 59                                                | 1 (referent)            | 1 (referent)                           | 111                            | 1 (referent)            | 1 (referent)                           |
| Past smoker                                | 262          | 78                                                | 0.94 (0.66-1.33)        | 0.89 (0.62-1.28)                       | 155                            | 1.06 (0.82-1.38)        | 0.88 (0.67-1.14)                       |
| Current smoker                             | 35           | 18                                                | 2.21 (1.33-3.68)        | 2.15 (1.21-3.80)                       | 29                             | 1.96 (1.28-2.98)        | 2.04 (1.34-3.09)                       |
| Intermediate/high                          |              |                                                   |                         |                                        |                                |                         |                                        |
| Never smoker                               | 48           | 9                                                 | 1 (referent)            | 1 (referent)                           | 25                             | 1 (referent)            | 1 (referent)                           |
| Past smoker                                | 75           | 17                                                | 0.97 (0.42-2.24)        | 0.82 (0.34-1.96)                       | 42                             | 1.02 (0.62-1.68)        | 0.90 (0.54-1.50)                       |
| Current smoker                             | 7            | 3                                                 | 1.85 (0.42-8.22)        | 1.37 (0.32-5.80)                       | 5                              | 1.42 (0.52-3.86)        | 2.07 (0.87-4.89)                       |
| <b>Intratumoral periglandular reaction</b> |              |                                                   |                         |                                        |                                |                         |                                        |
| <b>Female (NHS) (n = 840)</b>              |              |                                                   |                         |                                        |                                |                         |                                        |
| Negative/low                               |              |                                                   |                         |                                        |                                |                         |                                        |
| Never smoker                               | 54           | 25                                                | 1 (referent)            | 1 (referent)                           | 34                             | 1 (referent)            | 1 (referent)                           |
| Past smoker                                | 47           | 12                                                | 0.48 (0.24-0.97)        | 0.57 (0.28-1.19)                       | 24                             | 1.11 (0.60-2.03)        | 1.00 (0.58-1.71)                       |
| Current smoker                             | 15           | 7                                                 | 1.18 (0.50-2.81)        | 0.80 (0.39-1.65)                       | 10                             | 1.74 (0.76-3.96)        | 1.47 (0.65-3.32)                       |
| Intermediate/high                          |              |                                                   |                         |                                        |                                |                         |                                        |
| Never smoker                               | 295          | 84                                                | 1 (referent)            | 1 (referent)                           | 172                            | 1 (referent)            | 1 (referent)                           |
| Past smoker                                | 340          | 80                                                | 0.82 (0.59-1.13)        | 0.76 (0.54-1.06)                       | 199                            | 0.99 (0.79-1.24)        | 0.95 (0.75-1.19)                       |
| Current smoker                             | 89           | 34                                                | 1.27 (0.85-1.89)        | 0.98 (0.63-1.50)                       | 71                             | 1.26 (0.95-1.69)        | 1.42 (1.01-2.00)                       |
| <b>Male (HPFS) (n = 630)</b>               |              |                                                   |                         |                                        |                                |                         |                                        |
| Negative/low                               |              |                                                   |                         |                                        |                                |                         |                                        |
| Never smoker                               | 26           | 16                                                | 1 (referent)            | 1 (referent)                           | 20                             | 1 (referent)            | 1 (referent)                           |
| Past smoker                                | 43           | 22                                                | 0.60 (0.32-1.12)        | 0.74 (0.39-1.40)                       | 27                             | 0.57 (0.32-1.02)        | 0.63 (0.33-1.20)                       |
| Current smoker                             | 6            | 3                                                 | 0.71 (0.16-3.20)        | 3.85 (1.18-12.6)                       | 4                              | 0.67 (0.18-2.43)        | 1.34 (0.37-4.90)                       |
| Intermediate/high                          |              |                                                   |                         |                                        |                                |                         |                                        |
| Never smoker                               | 224          | 52                                                | 1 (referent)            | 1 (referent)                           | 116                            | 1 (referent)            | 1 (referent)                           |
| Past smoker                                | 295          | 73                                                | 0.99 (0.69-1.43)        | 0.92 (0.62-1.35)                       | 170                            | 1.11 (0.87-1.43)        | 0.92 (0.72-1.17)                       |
| Current smoker                             | 36           | 18                                                | 2.69 (1.58-4.61)        | 2.21 (1.25-3.90)                       | 30                             | 2.08 (1.36-3.17)        | 2.02 (1.34-3.05)                       |

**Peritumoral lymphocytic reaction**

**Female (NHS) (n = 838)**

Negative/low

|                |    |    |                  |                  |    |                  |                  |
|----------------|----|----|------------------|------------------|----|------------------|------------------|
| Never smoker   | 51 | 23 | 1 (referent)     | 1 (referent)     | 34 | 1 (referent)     | 1 (referent)     |
| Past smoker    | 51 | 18 | 0.70 (0.37-1.31) | 1.20 (0.61-2.37) | 28 | 1.14 (0.59-2.17) | 1.19 (0.70-2.05) |
| Current smoker | 17 | 7  | 0.95 (0.38-2.35) | 0.89 (0.41-1.92) | 12 | 1.45 (0.71-2.96) | 1.76 (0.83-3.72) |

Intermediate/high

|                |     |    |                  |                  |     |                  |                  |
|----------------|-----|----|------------------|------------------|-----|------------------|------------------|
| Never smoker   | 297 | 86 | 1 (referent)     | 1 (referent)     | 172 | 1 (referent)     | 1 (referent)     |
| Past smoker    | 335 | 74 | 0.76 (0.55-1.05) | 0.66 (0.48-0.92) | 195 | 0.98 (0.79-1.23) | 0.92 (0.73-1.16) |
| Current smoker | 87  | 34 | 1.30 (0.88-1.93) | 0.94 (0.61-1.43) | 69  | 1.29 (0.95-1.74) | 1.37 (0.97-1.93) |

**Male (HPFS) (n = 627)**

Negative/low

|                |    |    |                  |                  |    |                  |                  |
|----------------|----|----|------------------|------------------|----|------------------|------------------|
| Never smoker   | 41 | 25 | 1 (referent)     | 1 (referent)     | 32 | 1 (referent)     | 1 (referent)     |
| Past smoker    | 42 | 25 | 0.82 (0.46-1.47) | 1.05 (0.55-2.00) | 30 | 0.74 (0.43-1.27) | 0.87 (0.49-1.57) |
| Current smoker | 7  | 6  | 1.50 (0.67-3.33) | 1.15 (0.34-3.93) | 7  | 1.41 (0.67-2.97) | 1.10 (0.44-2.74) |

Intermediate/high

|                |     |    |                  |                  |     |                  |                  |
|----------------|-----|----|------------------|------------------|-----|------------------|------------------|
| Never smoker   | 209 | 43 | 1 (referent)     | 1 (referent)     | 104 | 1 (referent)     | 1 (referent)     |
| Past smoker    | 293 | 70 | 1.10 (0.74-1.62) | 0.98 (0.65-1.47) | 166 | 1.18 (0.91-1.53) | 0.96 (0.75-1.24) |
| Current smoker | 35  | 15 | 2.51 (1.36-4.63) | 2.49 (1.34-4.64) | 27  | 1.97 (1.26-3.09) | 2.09 (1.34-3.25) |

**Crohn's-like lymphoid reaction**

**Female (NHS) (n = 701)**

Negative/low

|                |     |    |                  |                  |     |                  |                  |
|----------------|-----|----|------------------|------------------|-----|------------------|------------------|
| Never smoker   | 229 | 74 | 1 (referent)     | 1 (referent)     | 138 | 1 (referent)     | 1 (referent)     |
| Past smoker    | 246 | 64 | 0.75 (0.53-1.06) | 0.77 (0.54-1.11) | 142 | 0.92 (0.69-1.21) | 0.93 (0.71-1.22) |
| Current smoker | 58  | 29 | 1.56 (1.03-2.36) | 1.16 (0.75-1.81) | 45  | 1.38 (0.93-2.07) | 1.64 (1.06-2.53) |

Intermediate/high

|                |    |    |                  |                  |    |                  |                  |
|----------------|----|----|------------------|------------------|----|------------------|------------------|
| Never smoker   | 60 | 16 | 1 (referent)     | 1 (referent)     | 36 | 1 (referent)     | 1 (referent)     |
| Past smoker    | 85 | 8  | 0.31 (0.13-0.77) | 0.29 (0.11-0.77) | 45 | 0.92 (0.61-1.39) | 0.85 (0.56-1.31) |
| Current smoker | 23 | 2  | 0.32 (0.07-1.53) | 0.46 (0.13-1.67) | 18 | 0.99 (0.63-1.56) | 1.54 (0.91-1.62) |

**Male (HPFS) (n = 506)**

Negative/low

|                |     |    |                  |                  |     |                  |                  |
|----------------|-----|----|------------------|------------------|-----|------------------|------------------|
| Never smoker   | 162 | 57 | 1 (referent)     | 1 (referent)     | 97  | 1 (referent)     | 1 (referent)     |
| Past smoker    | 194 | 65 | 0.93 (0.64-1.34) | 0.91 (0.62-1.33) | 118 | 1.04 (0.78-1.39) | 0.95 (0.71-1.27) |
| Current smoker | 26  | 14 | 1.95 (1.13-3.36) | 2.21 (1.29-3.81) | 22  | 1.77 (1.09-2.86) | 2.06 (1.29-3.27) |

Intermediate/high

|                |    |    |                  |                  |    |                  |                  |
|----------------|----|----|------------------|------------------|----|------------------|------------------|
| Never smoker   | 38 | 4  | 1 (referent)     | 1 (referent)     | 17 | 1 (referent)     | 1 (referent)     |
| Past smoker    | 78 | 13 | 0.97 (0.29-3.27) | 0.80 (0.24-2.73) | 38 | 0.93 (0.52-1.69) | 0.67 (0.40-1.14) |
| Current smoker | 8  | 3  | 2.07 (0.41-10.5) | 1.89 (0.38-9.54) | 5  | 1.45 (0.61-3.43) | 1.11 (0.44-2.78) |

\* IPW was applied to reduce a bias due to the availability of tumor tissue after cancer diagnosis (see “Statistical Analysis” subsection for details).

† HRs were estimated for each stratum on the basis of the cases with smoking status at diagnosis, using a re-parameterization of the interaction term in a single regression model for the stratified analyses.

‡ The multivariable Cox regression model initially included age, year of diagnosis, family history of colorectal cancer, body mass index at diagnosis, alcohol consumption at diagnosis, physical activity at diagnosis, processed meat intake at diagnosis, total fiber intake at diagnosis, tumor location, tumor differentiation, AJCC disease stage, microsatellite instability, CpG island methylator phenotype, long interspersed nucleotide element-1 methylation level, *KRAS* mutation, *BRAF* mutation, and *PIK3CA* mutation. A backward elimination with a threshold of  $P = 0.05$  was used to select variables in the final models.

Abbreviations: CI, confidence interval; HPFS, Health Professional Follow-up Study, HR, hazard ratio; IPW, inverse probability weighting; NHS, Nurses' Health Study.

Supplementary table S5. Smoking status at diagnosis and colorectal cancer mortality in strata of levels of lymphocytic reaction patterns

|                                              | No. of cases | Colorectal cancer-specific mortality <sup>*,†</sup> |                         |                                        | Overall mortality <sup>*,†</sup> |                         |                                        |
|----------------------------------------------|--------------|-----------------------------------------------------|-------------------------|----------------------------------------|----------------------------------|-------------------------|----------------------------------------|
|                                              |              | No. of events                                       | Univariable HR (95% CI) | Multivariable HR (95% CI) <sup>‡</sup> | No. of events                    | Univariable HR (95% CI) | Multivariable HR (95% CI) <sup>‡</sup> |
| <b>Tumor-infiltrating lymphocytes</b>        |              |                                                     |                         |                                        |                                  |                         |                                        |
| <b>Colon (n = 1,157)</b>                     |              |                                                     |                         |                                        |                                  |                         |                                        |
| Negative/low                                 |              |                                                     |                         |                                        |                                  |                         |                                        |
| Never smoker                                 | 354          | 107                                                 | 1 (referent)            | 1 (referent)                           | 202                              | 1 (referent)            | 1 (referent)                           |
| Past smoker                                  | 409          | 125                                                 | 1.04 (0.79-1.36)        | 0.94 (0.71-1.24)                       | 246                              | 1.17 (0.94-1.45)        | 1.05 (0.85-1.29)                       |
| Current smoker                               | 68           | 32                                                  | 1.59 (1.05-2.39)        | 1.40 (0.94-2.10)                       | 53                               | 1.53 (1.09-2.14)        | 1.74 (1.24-2.43)                       |
| Intermediate/high                            |              |                                                     |                         |                                        |                                  |                         |                                        |
| Never smoker                                 | 127          | 32                                                  | 1 (referent)            | 1 (referent)                           | 73                               | 1 (referent)            | 1 (referent)                           |
| Past smoker                                  | 161          | 24                                                  | 0.49 (0.28-0.87)        | 0.52 (0.29-0.90)                       | 89                               | 0.95 (0.70-1.30)        | 0.85 (0.61-1.19)                       |
| Current smoker                               | 38           | 6                                                   | 0.46 (0.18-1.16)        | 0.38 (0.13-1.10)                       | 29                               | 0.96 (0.62-1.48)        | 0.98 (0.56-1.73)                       |
| <b>Rectum (n = 308)</b>                      |              |                                                     |                         |                                        |                                  |                         |                                        |
| Negative/low                                 |              |                                                     |                         |                                        |                                  |                         |                                        |
| Never smoker                                 | 103          | 33                                                  | 1 (referent)            | 1 (referent)                           | 59                               | 1 (referent)            | 1 (referent)                           |
| Past smoker                                  | 127          | 33                                                  | 0.59 (0.36-0.99)        | 0.58 (0.34-0.99)                       | 77                               | 0.88 (0.60-1.30)        | 0.74 (0.49-1.10)                       |
| Current smoker                               | 35           | 21                                                  | 2.13 (1.26-3.61)        | 1.58 (0.86-2.91)                       | 29                               | 1.96 (1.21-3.19)        | 1.99 (1.11-3.56)                       |
| Intermediate/high                            |              |                                                     |                         |                                        |                                  |                         |                                        |
| Never smoker                                 | 15           | 4                                                   | 1 (referent)            | 1 (referent)                           | 7                                | 1 (referent)            | 1 (referent)                           |
| Past smoker                                  | 25           | 5                                                   | 0.51 (0.13-1.96)        | 0.71 (0.14-3.73)                       | 11                               | 0.85 (0.34-2.15)        | 0.96 (0.37-2.50)                       |
| Current smoker                               | 3            | 1                                                   | 0.63 (0.06-6.19)        | 0.72 (0.09-5.74)                       | 2                                | 0.57 (0.09-3.74)        | 0.95 (0.21-4.34)                       |
| <b>Intratatumoral periglandular reaction</b> |              |                                                     |                         |                                        |                                  |                         |                                        |
| <b>Colon (n = 1,156)</b>                     |              |                                                     |                         |                                        |                                  |                         |                                        |
| Negative/low                                 |              |                                                     |                         |                                        |                                  |                         |                                        |
| Never smoker                                 | 61           | 32                                                  | 1 (referent)            | 1 (referent)                           | 42                               | 1 (referent)            | 1 (referent)                           |
| Past smoker                                  | 74           | 27                                                  | 0.67 (0.39-1.15)        | 0.66 (0.39-1.12)                       | 41                               | 1.32 (0.73-2.37)        | 1.04 (0.63-1.72)                       |
| Current smoker                               | 16           | 7                                                   | 0.94 (0.37-2.38)        | 0.82 (0.35-1.91)                       | 10                               | 1.43 (0.59-3.50)        | 1.28 (0.52-3.10)                       |
| Intermediate/high                            |              |                                                     |                         |                                        |                                  |                         |                                        |
| Never smoker                                 | 418          | 107                                                 | 1 (referent)            | 1 (referent)                           | 233                              | 1 (referent)            | 1 (referent)                           |
| Past smoker                                  | 496          | 122                                                 | 0.95 (0.72-1.25)        | 0.88 (0.67-1.17)                       | 291                              | 1.09 (0.90-1.31)        | 0.99 (0.82-1.19)                       |
| Current smoker                               | 91           | 32                                                  | 1.26 (0.83-1.90)        | 1.14 (0.74-1.75)                       | 73                               | 1.30 (0.99-1.71)        | 1.42 (1.02-1.97)                       |
| <b>Rectum (n = 309)</b>                      |              |                                                     |                         |                                        |                                  |                         |                                        |
| Negative/low                                 |              |                                                     |                         |                                        |                                  |                         |                                        |
| Never smoker                                 | 18           | 8                                                   | 1 (referent)            | 1 (referent)                           | 11                               | 1 (referent)            | 1 (referent)                           |
| Past smoker                                  | 15           | 7                                                   | 0.80 (0.30-2.11)        | 0.93 (0.41-2.10)                       | 10                               | 1.14 (0.43-3.05)        | 1.06 (0.46-2.48)                       |
| Current smoker                               | 5            | 3                                                   | 1.48 (0.53-4.08)        | 1.10 (0.32-3.79)                       | 4                                | 2.03 (0.73-5.69)        | 2.22 (0.79-6.26)                       |
| Intermediate/high                            |              |                                                     |                         |                                        |                                  |                         |                                        |
| Never smoker                                 | 101          | 29                                                  | 1 (referent)            | 1 (referent)                           | 55                               | 1 (referent)            | 1 (referent)                           |

|                                         |     |     |                  |                  |     |                  |                  |
|-----------------------------------------|-----|-----|------------------|------------------|-----|------------------|------------------|
| Past smoker                             | 137 | 30  | 0.57 (0.33-0.99) | 0.53 (0.28-0.97) | 77  | 0.87 (0.59-1.27) | 0.71 (0.47-1.08) |
| Current smoker                          | 33  | 19  | 2.20 (1.21-4.00) | 1.55 (0.80-3.00) | 27  | 1.76 (1.01-3.05) | 1.78 (0.97-3.29) |
| <b>Peritumoral lymphocytic reaction</b> |     |     |                  |                  |     |                  |                  |
| <b>Colon (n = 1,152)</b>                |     |     |                  |                  |     |                  |                  |
| Negative/low                            |     |     |                  |                  |     |                  |                  |
| Never smoker                            | 72  | 39  | 1 (referent)     | 1 (referent)     | 53  | 1 (referent)     | 1 (referent)     |
| Past smoker                             | 70  | 34  | 0.90 (0.55-1.47) | 1.18 (0.69-2.02) | 45  | 1.44 (0.83-2.52) | 1.36 (0.85-2.18) |
| Current smoker                          | 19  | 9   | 0.80 (0.33-1.91) | 0.96 (0.42-2.16) | 14  | 1.16 (0.56-2.38) | 1.59 (0.75-3.35) |
| Intermediate/high                       |     |     |                  |                  |     |                  |                  |
| Never smoker                            | 406 | 100 | 1 (referent)     | 1 (referent)     | 222 | 1 (referent)     | 1 (referent)     |
| Past smoker                             | 497 | 115 | 0.92 (0.69-1.22) | 0.83 (0.62-1.10) | 286 | 1.09 (0.90-1.31) | 0.97 (0.80-1.17) |
| Current smoker                          | 88  | 30  | 1.31 (0.86-1.98) | 1.07 (0.68-1.67) | 69  | 1.34 (1.01-1.78) | 1.36 (0.97-1.90) |
| <b>Rectum (n = 308)</b>                 |     |     |                  |                  |     |                  |                  |
| Negative/low                            |     |     |                  |                  |     |                  |                  |
| Never smoker                            | 19  | 8   | 1 (referent)     | 1 (referent)     | 12  | 1 (referent)     | 1 (referent)     |
| Past smoker                             | 22  | 9   | 0.65 (0.24-1.75) | 0.91 (0.36-2.25) | 13  | 0.71 (0.23-2.17) | 0.79 (0.34-1.83) |
| Current smoker                          | 4   | 3   | 1.97 (0.68-5.67) | 1.08 (0.30-3.87) | 4   | 2.64 (0.95-7.32) | 1.95 (0.66-5.76) |
| Intermediate/high                       |     |     |                  |                  |     |                  |                  |
| Never smoker                            | 100 | 29  | 1 (referent)     | 1 (referent)     | 54  | 1 (referent)     | 1 (referent)     |
| Past smoker                             | 129 | 28  | 0.55 (0.32-0.96) | 0.51 (0.28-0.94) | 74  | 0.90 (0.61-1.31) | 0.75 (0.49-1.14) |
| Current smoker                          | 34  | 19  | 2.08 (1.15-3.76) | 1.56 (0.80-3.02) | 27  | 1.71 (0.99-2.96) | 1.84 (1.00-3.41) |
| <b>Crohn's-like lymphoid reaction</b>   |     |     |                  |                  |     |                  |                  |
| <b>Colon (n = 956)</b>                  |     |     |                  |                  |     |                  |                  |
| Negative/low                            |     |     |                  |                  |     |                  |                  |
| Never smoker                            | 311 | 103 | 1 (referent)     | 1 (referent)     | 185 | 1 (referent)     | 1 (referent)     |
| Past smoker                             | 328 | 99  | 0.93 (0.70-1.25) | 0.95 (0.72-1.27) | 191 | 1.07 (0.84-1.36) | 1.06 (0.85-1.32) |
| Current smoker                          | 55  | 24  | 1.40 (0.89-2.19) | 1.24 (0.78-1.97) | 42  | 1.33 (0.88-2.00) | 1.47 (0.94-2.30) |
| Intermediate/high                       |     |     |                  |                  |     |                  |                  |
| Never smoker                            | 89  | 17  | 1 (referent)     | 1 (referent)     | 49  | 1 (referent)     | 1 (referent)     |
| Past smoker                             | 143 | 16  | 0.44 (0.21-0.90) | 0.38 (0.18-0.81) | 75  | 0.96 (0.68-1.36) | 0.78 (0.54-1.12) |
| Current smoker                          | 30  | 4   | 0.51 (0.15-1.72) | 0.62 (0.19-2.03) | 22  | 1.07 (0.71-1.61) | 1.34 (0.83-2.18) |
| <b>Rectum (n = 247)</b>                 |     |     |                  |                  |     |                  |                  |
| Negative/low                            |     |     |                  |                  |     |                  |                  |
| Never smoker                            | 80  | 28  | 1 (referent)     | 1 (referent)     | 50  | 1 (referent)     | 1 (referent)     |
| Past smoker                             | 110 | 30  | 0.54 (0.31-0.93) | 0.51 (0.29-0.90) | 69  | 0.78 (0.51-1.20) | 0.70 (0.47-1.05) |
| Current smoker                          | 28  | 18  | 1.90 (1.05-3.45) | 1.66 (0.84-3.27) | 24  | 1.63 (0.91-2.92) | 2.09 (1.14-3.81) |
| Intermediate/high                       |     |     |                  |                  |     |                  |                  |
| Never smoker                            | 8   | 2   | 1 (referent)     | 1 (referent)     | 3   | 1 (referent)     | 1 (referent)     |
| Past smoker                             | 20  | 5   | 1.04 (0.22-4.91) | 1.14 (0.25-5.20) | 8   | 1.20 (0.33-4.33) | 1.31 (0.31-5.46) |
| Current smoker                          | 1   | 1   | 4.52 (1.28-15.9) | 1.61 (0.43-6.05) | 1   | 3.71 (1.32-10.4) | 1.22 (0.35-4.20) |



\* IPW was applied to reduce a bias due to the availability of tumor tissue after cancer diagnosis (see “Statistical Analysis” subsection for details).

† HRs were estimated for each stratum on the basis of the cases with smoking status at diagnosis, using a re-parameterization of the interaction term in a single regression model for the stratified analyses.

‡ The multivariable Cox regression model initially included age, sex, year of diagnosis, family history of colorectal cancer, body mass index at diagnosis, alcohol consumption at diagnosis, physical activity at diagnosis, processed meat intake at diagnosis, total fiber intake at diagnosis, tumor differentiation, AJCC disease stage, microsatellite instability, CpG island methylator phenotype, long interspersed nucleotide element-1 methylation level, *KRAS* mutation, *BRAF* mutation, and *PIK3CA* mutation. A backward elimination with a threshold of  $P = 0.05$  was used to select variables in the final models.

Abbreviations: CI, confidence interval; HR, hazard ratio; IPW, inverse probability weighting.

Supplementary table S6. Duration of smoking cessation years at diagnosis and colorectal cancer mortality in strata of levels of lymphocytic reaction patterns

|                                                        | No. of cases | Colorectal cancer-specific mortality <sup>*,†</sup> |                         |                                        | Overall mortality <sup>*,†</sup> |                         |                                        |
|--------------------------------------------------------|--------------|-----------------------------------------------------|-------------------------|----------------------------------------|----------------------------------|-------------------------|----------------------------------------|
|                                                        |              | No. of events                                       | Univariable HR (95% CI) | Multivariable HR (95% CI) <sup>‡</sup> | No. of events                    | Univariable HR (95% CI) | Multivariable HR (95% CI) <sup>‡</sup> |
| <b>Tumor-infiltrating lymphocytes (n = 1,391)</b>      |              |                                                     |                         |                                        |                                  |                         |                                        |
| Negative/low                                           |              |                                                     |                         |                                        |                                  |                         |                                        |
| Never smoker                                           | 426          | 124                                                 | 1 (referent)            | 1 (referent)                           | 238                              | 1 (referent)            | 1 (referent)                           |
| Past smoker ≥ 10 years quit                            | 277          | 81                                                  | 0.92 (0.68-1.25)        | 0.83 (0.60-1.15)                       | 158                              | 1.02 (0.81-1.29)        | 0.88 (0.70-1.12)                       |
| Past smoker < 10 years quit                            | 228          | 62                                                  | 0.87 (0.64-1.20)        | 0.78 (0.57-1.06)                       | 136                              | 1.10 (0.85-1.41)        | 1.04 (0.82-1.31)                       |
| Current smoker                                         | 104          | 54                                                  | 1.88 (1.36-2.60)        | 1.50 (1.08-2.08)                       | 83                               | 1.71 (1.29-2.26)        | 2.02 (1.53-2.68)                       |
| Intermediate/high                                      |              |                                                     |                         |                                        |                                  |                         |                                        |
| Never smoker                                           | 135          | 35                                                  | 1 (referent)            | 1 (referent)                           | 76                               | 1 (referent)            | 1 (referent)                           |
| Past smoker ≥ 10 years quit                            | 85           | 16                                                  | 0.56 (0.29-1.09)        | 0.57 (0.28-1.16)                       | 47                               | 0.92 (0.63-1.33)        | 0.78 (0.53-1.14)                       |
| Past smoker < 10 years quit                            | 95           | 13                                                  | 0.50 (0.25-0.99)        | 0.52 (0.26-1.06)                       | 51                               | 1.02 (0.72-1.43)        | 0.94 (0.66-1.35)                       |
| Current smoker                                         | 41           | 7                                                   | 0.46 (0.20-1.11)        | 0.40 (0.15-1.07)                       | 31                               | 0.93 (0.60-1.43)        | 1.09 (0.68-1.76)                       |
| <i>P</i> <sub>interaction</sub> <sup>§</sup>           |              |                                                     | 0.003                   | 0.010                                  |                                  | 0.065                   | 0.082                                  |
| <b>Intratumoral periglandular reaction (n = 1,390)</b> |              |                                                     |                         |                                        |                                  |                         |                                        |
| Negative/low                                           |              |                                                     |                         |                                        |                                  |                         |                                        |
| Never smoker                                           | 74           | 36                                                  | 1 (referent)            | 1 (referent)                           | 49                               | 1 (referent)            | 1 (referent)                           |
| Past smoker ≥ 10 years quit                            | 34           | 16                                                  | 0.82 (0.45-1.49)        | 0.88 (0.47-1.67)                       | 18                               | 1.01 (0.53-1.91)        | 0.80 (0.45-1.44)                       |
| Past smoker < 10 years quit                            | 49           | 13                                                  | 0.47 (0.24-0.92)        | 0.56 (0.29-1.10)                       | 27                               | 1.15 (0.66-2.01)        | 1.01 (0.61-1.66)                       |
| Current smoker                                         | 21           | 10                                                  | 1.10 (0.51-2.38)        | 0.88 (0.41-1.88)                       | 14                               | 1.52 (0.72-3.21)        | 1.28 (0.58-2.81)                       |
| Intermediate/high                                      |              |                                                     |                         |                                        |                                  |                         |                                        |
| Never smoker                                           | 485          | 123                                                 | 1 (referent)            | 1 (referent)                           | 265                              | 1 (referent)            | 1 (referent)                           |
| Past smoker ≥ 10 years quit                            | 328          | 80                                                  | 0.87 (0.64-1.19)        | 0.76 (0.55-1.06)                       | 186                              | 1.01 (0.82-1.23)        | 0.86 (0.69-1.07)                       |
| Past smoker < 10 years quit                            | 274          | 62                                                  | 0.86 (0.62-1.18)        | 0.78 (0.57-1.08)                       | 160                              | 1.08 (0.86-1.34)        | 1.07 (0.86-1.33)                       |
| Current smoker                                         | 125          | 52                                                  | 1.58 (1.13-2.21)        | 1.26 (0.88-1.80)                       | 101                              | 1.45 (1.13-1.86)        | 1.63 (1.25-2.14)                       |
| <i>P</i> <sub>interaction</sub> <sup>§</sup>           |              |                                                     | 0.18                    | 0.29                                   |                                  | 0.87                    | 0.59                                   |

**Peritumoral lymphocytic reaction (n = 1,385)**

|                               |     |     |                  |                  |     |                  |                  |
|-------------------------------|-----|-----|------------------|------------------|-----|------------------|------------------|
| Negative/low                  |     |     |                  |                  |     |                  |                  |
| Never smoker                  | 83  | 42  | 1 (referent)     | 1 (referent)     | 59  | 1 (referent)     | 1 (referent)     |
| Past smoker ≥ 10 years quit   | 38  | 21  | 1.03 (0.59-1.78) | 1.38 (0.75-2.56) | 26  | 1.40 (0.78-2.50) | 1.15 (0.70-1.91) |
| Past smoker < 10 years quit   | 49  | 17  | 0.60 (0.33-1.08) | 0.78 (0.42-1.45) | 26  | 0.87 (0.47-1.64) | 0.80 (0.49-1.31) |
| Current smoker                | 24  | 13  | 1.04 (0.52-2.10) | 0.89 (0.47-1.68) | 19  | 1.34 (0.72-2.51) | 1.28 (0.70-2.34) |
| Intermediate/high             |     |     |                  |                  |     |                  |                  |
| Never smoker                  | 475 | 117 | 1 (referent)     | 1 (referent)     | 255 | 1 (referent)     | 1 (referent)     |
| Past smoker ≥ 10 years quit   | 320 | 75  | 0.85 (0.62-1.16) | 0.72 (0.52-1.01) | 177 | 0.98 (0.80-1.21) | 0.80 (0.64-1.00) |
| Past smoker < 10 years quit   | 274 | 58  | 0.82 (0.59-1.14) | 0.73 (0.53-1.02) | 161 | 1.12 (0.90-1.39) | 1.08 (0.87-1.36) |
| Current smoker                | 122 | 49  | 1.58 (1.12-2.22) | 1.23 (0.85-1.80) | 96  | 1.46 (1.13-1.89) | 1.56 (1.17-2.09) |
| $P_{\text{interaction}}^{\S}$ |     |     | 0.25             | 0.55             |     | 0.61             | 0.47             |

**Crohn's-like lymphoid reaction (n = 1,143)**

|                               |     |     |                  |                  |     |                  |                  |
|-------------------------------|-----|-----|------------------|------------------|-----|------------------|------------------|
| Negative/low                  |     |     |                  |                  |     |                  |                  |
| Never smoker                  | 363 | 115 | 1 (referent)     | 1 (referent)     | 215 | 1 (referent)     | 1 (referent)     |
| Past smoker ≥ 10 years quit   | 219 | 67  | 0.89 (0.64-1.22) | 0.86 (0.61-1.21) | 124 | 0.93 (0.72-1.22) | 0.83 (0.64-1.08) |
| Past smoker < 10 years quit   | 196 | 49  | 0.73 (0.52-1.04) | 0.74 (0.52-1.05) | 115 | 0.99 (0.76-1.30) | 1.06 (0.82-1.37) |
| Current smoker                | 84  | 43  | 1.72 (1.22-2.44) | 1.34 (0.92-1.94) | 67  | 1.51 (1.08-2.10) | 1.75 (1.24-2.49) |
| Intermediate/high             |     |     |                  |                  |     |                  |                  |
| Never smoker                  | 95  | 20  | 1 (referent)     | 1 (referent)     | 51  | 1 (referent)     | 1 (referent)     |
| Past smoker ≥ 10 years quit   | 75  | 8   | 0.30 (0.13-0.71) | 0.26 (0.10-0.67) | 36  | 0.77 (0.52-1.12) | 0.55 (0.37-0.82) |
| Past smoker < 10 years quit   | 80  | 11  | 0.55 (0.26-1.20) | 0.57 (0.26-1.25) | 44  | 1.14 (0.78-1.67) | 1.06 (0.72-1.55) |
| Current smoker                | 31  | 5   | 0.54 (0.18-1.59) | 0.61 (0.22-1.73) | 23  | 1.10 (0.74-1.64) | 1.27 (0.81-1.99) |
| $P_{\text{interaction}}^{\S}$ |     |     | 0.093            | 0.23             |     | 0.76             | 0.82             |

\* IPW was applied to reduce a bias due to the availability of tumor tissue after cancer diagnosis (see "Statistical Analysis" subsection for details).

† HRs were estimated for each stratum on the basis of the cases with duration of smoking cessation years at diagnosis, using a re-parameterization of the interaction term in a single regression model for the stratified analyses.

‡ The multivariable Cox regression model initially included age, sex, year of diagnosis, family history of colorectal cancer, body mass index at diagnosis, alcohol consumption at diagnosis, physical activity at diagnosis, processed meat intake at diagnosis, total fiber intake at diagnosis, tumor location, tumor differentiation, AJCC disease stage, microsatellite instability, CpG island methylator phenotype, long interspersed nucleotide element-1 methylation level, *KRAS* mutation, *BRAF* mutation, and *PIK3CA* mutation. A backward elimination with a threshold of  $P = 0.05$  was used to select variables in the final models.

§  $P_{\text{interaction}}$  was calculated using the Wald test for the cross-product of duration of smoking cessation years at diagnosis (ordinal; non-current, ≥ 10 years, < 10 years, and current) and lymphocytic reaction status (binary; negative/low and intermediate/high) in Cox regression model.

Abbreviations: IPW, inverse probability weighting; CI, confidence interval; HR, hazard ratio.

Supplementary table S7. Post diagnostic smoking status and colorectal cancer mortality in strata of levels of lymphocytic reaction patterns

|                                                        | Postdiagnosis smoking status* | No. of cases | Colorectal cancer-specific mortality <sup>†,‡</sup> |                         |                                        | Overall mortality <sup>†,‡</sup> |                         |                                        |
|--------------------------------------------------------|-------------------------------|--------------|-----------------------------------------------------|-------------------------|----------------------------------------|----------------------------------|-------------------------|----------------------------------------|
|                                                        |                               |              | No. of events                                       | Univariable HR (95% CI) | Multivariable HR (95% CI) <sup>§</sup> | No. of events                    | Univariable HR (95% CI) | Multivariable HR (95% CI) <sup>§</sup> |
| <b>Tumor-infiltrating lymphocytes (n = 1,289)</b>      |                               |              |                                                     |                         |                                        |                                  |                         |                                        |
| <b>Negative/low</b>                                    |                               |              |                                                     |                         |                                        |                                  |                         |                                        |
|                                                        | Non-current                   | 904          | 216                                                 | 1 (referent)            | 1 (referent)                           | 492                              | 1 (referent)            | 1 (referent)                           |
|                                                        | Current                       | 53           | 20                                                  | 1.93 (1.18-3.15)        | 1.77 (1.09-2.88)                       | 42                               | 1.89 (1.37-2.61)        | 1.92 (1.37-2.70)                       |
| <b>Intermediate/high</b>                               |                               |              |                                                     |                         |                                        |                                  |                         |                                        |
|                                                        | Non-current                   | 307          | 44                                                  | 1 (referent)            | 1 (referent)                           | 161                              | 1 (referent)            | 1 (referent)                           |
|                                                        | Current                       | 25           | 5                                                   | 1.13 (0.42-3.05)        | 1.33 (0.47-3.80)                       | 18                               | 0.98 (0.57-1.68)        | 1.34 (0.82-2.19)                       |
| <b>Intratumoral periglandular reaction (n = 1,289)</b> |                               |              |                                                     |                         |                                        |                                  |                         |                                        |
| <b>Negative/low</b>                                    |                               |              |                                                     |                         |                                        |                                  |                         |                                        |
|                                                        | Non-current                   | 142          | 46                                                  | 1 (referent)            | 1 (referent)                           | 75                               | 1 (referent)            | 1 (referent)                           |
|                                                        | Current                       | 8            | 1                                                   | 0.27 (0.04-1.85)        | 0.24 (0.04-1.56)                       | 4                                | 0.85 (0.32-2.24)        | 0.67 (0.23-2.00)                       |
| <b>Intermediate/high</b>                               |                               |              |                                                     |                         |                                        |                                  |                         |                                        |
|                                                        | Non-current                   | 1069         | 214                                                 | 1 (referent)            | 1 (referent)                           | 578                              | 1 (referent)            | 1 (referent)                           |
|                                                        | Current                       | 70           | 24                                                  | 2.01 (1.27-3.19)        | 1.99 (1.27-3.14)                       | 56                               | 1.65 (1.22-2.29)        | 1.94 (1.43-2.62)                       |
| <b>Peritumoral lymphocytic reaction (n = 1,285)</b>    |                               |              |                                                     |                         |                                        |                                  |                         |                                        |
| <b>Negative/low</b>                                    |                               |              |                                                     |                         |                                        |                                  |                         |                                        |
|                                                        | Non-current                   | 149          | 58                                                  | 1 (referent)            | 1 (referent)                           | 89                               | 1 (referent)            | 1 (referent)                           |
|                                                        | Current                       | 10           | 3                                                   | 0.36 (0.10-1.44)        | 0.40 (0.10-1.53)                       | 8                                | 0.91 (0.50-1.63)        | 1.06 (0.51-2.23)                       |
| <b>Intermediate/high</b>                               |                               |              |                                                     |                         |                                        |                                  |                         |                                        |
|                                                        | Non-current                   | 1058         | 202                                                 | 1 (referent)            | 1 (referent)                           | 564                              | 1 (referent)            | 1 (referent)                           |
|                                                        | Current                       | 68           | 22                                                  | 2.14 (1.34-3.41)        | 2.00 (1.26-3.18)                       | 52                               | 1.70 (1.24-2.35)        | 1.87 (1.36-2.57)                       |
| <b>Crohn's-like lymphoid reaction (n = 1,063)</b>      |                               |              |                                                     |                         |                                        |                                  |                         |                                        |
| <b>Negative/low</b>                                    |                               |              |                                                     |                         |                                        |                                  |                         |                                        |
|                                                        | Non-current                   | 742          | 182                                                 | 1 (referent)            | 1 (referent)                           | 413                              | 1 (referent)            | 1 (referent)                           |
|                                                        | Current                       | 44           | 19                                                  | 2.17 (1.34-3.54)        | 2.01 (1.28-3.16)                       | 34                               | 1.74 (1.34-2.66)        | 1.85 (1.22-2.79)                       |
| <b>Intermediate/high</b>                               |                               |              |                                                     |                         |                                        |                                  |                         |                                        |
|                                                        | Non-current                   | 254          | 32                                                  | 1 (referent)            | 1 (referent)                           | 128                              | 1 (referent)            | 1 (referent)                           |
|                                                        | Current                       | 23           | 5                                                   | 1.74 (0.59-5.12)        | 2.02 (0.74-6.36)                       | 18                               | 1.44 (0.98-2.12)        | 1.67 (1.01-2.76)                       |

\* Postdiagnosis smoking status was derived from the available questionnaire at least more than 6 months after colorectal cancer diagnosis.

† IPW was applied to reduce a bias due to the availability of tumor tissue after cancer diagnosis (see “Statistical Analysis” subsection for details).

‡ HRs were estimated for each stratum on the basis of the cases with smoking status at diagnosis, using a re-parameterization of the interaction term in a single regression model for the stratified analyses.

§ The multivariable Cox regression model initially included age, sex, year of diagnosis, family history of colorectal cancer, body mass index at diagnosis, alcohol consumption at diagnosis, physical activity at diagnosis, processed meat intake at diagnosis, total fiber intake at diagnosis, cumulative pack-years of cigarettes, tumor location, tumor differentiation, AJCC disease stage, microsatellite instability, CpG island methylator phenotype, long interspersed nucleotide element-1 methylation level, *KRAS* mutation, *BRAF* mutation, and *PIK3CA* mutation. A backward elimination with a threshold of  $P = 0.05$  was used to select variables in the final models.

Abbreviations: CI, confidence interval; HR, hazard ratio; IPW, inverse probability weighting.

Supplementary table S8. Prediction models for colorectal cancer-specific survival and overall survival

|                                                      | AUC    | <i>P</i> -value <sup>§</sup> |
|------------------------------------------------------|--------|------------------------------|
| <b>Five-year colorectal cancer-specific survival</b> |        |                              |
| Baseline <sup>*,†</sup>                              | 0.8128 | -                            |
| Baseline + smoking status at diagnosis               | 0.8128 | 0.85                         |
| Baseline + TIL status                                | 0.8137 | 0.73                         |
| Baseline + smoking status at diagnosis + TIL status  | 0.8137 | 0.74                         |
| <b>Five-year overall survival</b>                    |        |                              |
| Baseline <sup>*,‡</sup>                              | 0.7603 | -                            |
| Baseline + smoking status at diagnosis               | 0.7614 | 0.32                         |
| Baseline + TIL status                                | 0.7631 | 0.30                         |
| Baseline + smoking status at diagnosis + TIL status  | 0.7643 | 0.17                         |

\* The multivariable logistic regression model initially included age, sex, year of diagnosis, family history of colorectal cancer, body mass index at diagnosis, alcohol consumption at diagnosis, physical activity at diagnosis, processed meat intake at diagnosis, total fiber intake at diagnosis, tumor location, tumor differentiation, AJCC disease stage, microsatellite instability, CpG island methylator phenotype, long interspersed nucleotide element-1 methylation level, *KRAS* mutation, *BRAF* mutation, and *PIK3CA* mutation. A backward elimination with a threshold of  $P = 0.05$  was used to select variables in the final models.

† Baseline model included age, year of diagnosis, tumor location, tumor differentiation, AJCC stage, microsatellite instability, long interspersed nucleotide element-1 methylation level, *KRAS* mutation, and *BRAF* mutation.

‡ Baseline model included age, year of diagnosis, tumor differentiation, AJCC disease stage, microsatellite instability, and *BRAF* mutation.

§ The Mann-Whitney U test was performed to compare the baseline model of area under curve.

Abbreviations: AUC, area under curve; TIL tumor-infiltrating lymphocytes.
